# Supplementary material
Source: publisher figshare collection journal article supplement (https://gsapubs.figshare.com/ndownloader/files/22757195)
Supplement: Supplementary file 1 [file 22757195]

TABLE S1: ANALYTICAL RESULTS FOR EPITHERMAL DEPOSIT SAMPLES

| Sample Name             | Type  | Description                                         | Method    | $\delta^{202}\text{Hg}$ |
|-------------------------|-------|-----------------------------------------------------|-----------|-------------------------|
| <u>National</u>         |       |                                                     |           |                         |
| BN-5 352 <sup>†</sup>   | Vein  | Drusy quartz veinlet w/ stibnite                    | leach     | -0.1                    |
| BM-9                    | MC    | Blk metacinnabar layers in sinter                   | leach     | -0.2                    |
| BM-10                   | Cinn  | Red cinnabar layers in sinter                       | leach     | -2.3                    |
| BM-11                   | Cinn  | Red cinn in sinter w/ mudcrack textures             | leach     | -3.0                    |
| BM-12                   | Cinn  | Red cinn in sinter, taken from open cut at summit   | leach     | -1.4                    |
| BM-13                   | Cinn  | Silicified, bedded epiclastic sediments w/ red cinn | leach     | -0.4                    |
| BM-14                   | Vein  | Banded qtz vein, elec, Ag-selenides, tetra, py      | leach     | 0.5                     |
| BVPD03-1 <sup>§</sup>   | Vein  | Banded qtz vein, sulfides, selenides                | pyrolysis | -1.4                    |
| BVPD03-2 <sup>§</sup>   | Vein  | Banded qtz vein, sulfides, selenides                | pyrolysis | 1.3                     |
| BNMS-D <sup>§</sup>     | Cinn  | Bedded sinter, red cinn bands w/ brown detritus     | pyrolysis | -1.6                    |
| BNMS-E <sup>§</sup>     | Cinn  | Finely laminated sinter, red cinn bands             | pyrolysis | -3.5                    |
| BUCK02-1A1 <sup>§</sup> | MC    | Chalcedonic sinter w/ clots, diss. of blk metacinn  | pyrolysis | 0.4                     |
| BUCK02-1A2 <sup>§</sup> | MC    | Sinter w/ mixed blk metacinn and red cinn           | pyrolysis | 2.1                     |
| BUCK02-1A3 <sup>§</sup> | MC    | Sinter w/blk metacinn bands,clots w/ red cinn clots | pyrolysis | 0.3                     |
| BUCK02-5 <sup>§</sup>   | MC    | Blk porous metacinn bed in clastic sinter           | pyrolysis | 1.9                     |
| <u>Ivanhoe</u>          |       |                                                     |           |                         |
| IH76-902 <sup>#</sup>   | Vein  | Qtz vein and qtz cemented bx, py, selenides         | leach     | -0.6                    |
| VL-1                    | Cinn  | Frothy silica sinter replacing lithic tuff and seds | leach     | -0.8                    |
| VL-2                    | Cinn  | Alternating gry bands of silica and clastic layers  | leach     | -1.2                    |
| VL-3                    | Cinn  | White silicified tuff                               | leach     | -0.5                    |
| VL-10 <sup>#</sup>      | Cinn  | White silicified tuff                               | leach     | -0.5                    |
| BU-1                    | Cinn  | Sinter w/ red cinn, dessication cracks              | leach     | -0.9                    |
| BU-2                    | Cinn  | Sinter w/ red cinn, open cut                        | leach     | -0.9                    |
| KA-2                    | Cinn  | Sinter w/ red cinn, dessication cracks              | leach     | -0.9                    |
| CLEM-1 <sup>#</sup>     | Fault | Frothy silica, red cinn                             | leach     | -0.4                    |
| CLEM-2 <sup>#</sup>     | Fault | Frothy silica, silica cemented bx, red cinn         | leach     | -0.4                    |

Note: All  $\delta^{202}\text{Hg}$  values are reported relative to the NIST 3133 Hg standard. Errors on  $\delta^{202}\text{Hg}$  are  $\pm 0.1\text{‰}$  ( $2\sigma$ ) based on external reproducibility of natural ore samples.

\*MC = metacinnabar-bearing sinter, Cinn = cinnabar-bearing sinter

<sup>†</sup>Access to drill core provided by R. Hatch.

<sup>§</sup>Powdered splits provided by P.G. Vikre.

<sup>#</sup>Samples provided by B. Peppard.
